# Supplementary material for: Seasonal comparison of carrion volatiles in decomposition soil using comprehensive two-dimensional gas chromatography – time of flight mass spectrometry
Source: Royal Society of Chemistry journal article supplement (doi:10.1039/c4ay02321h), 2014-11-28
Supplement: c4ay02321h1.pdf [file c4ay02321h1.pdf]

Electronic Supplementary Information (ESI)

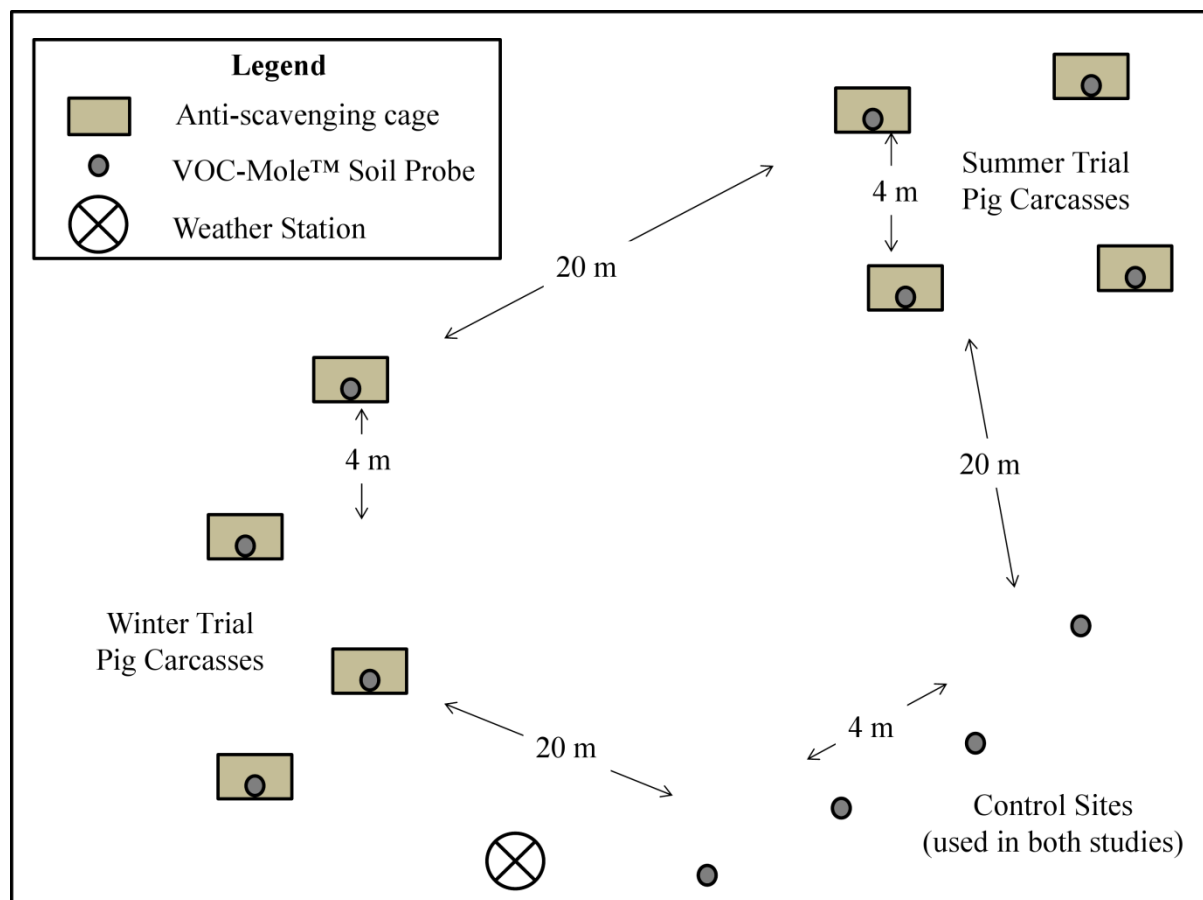

Figure S1. Schematic of field research site indicating the setup of the summer and winter trials (not to scale).

Table S1. Presence of significant VOCs detected during Winter 2013 trial according to compound class and stage of decomposition.

|                                       | Fresh | Bloat | Active Decay | Advanced Decay | Dry Remains |
|---------------------------------------|-------|-------|--------------|----------------|-------------|
| <b>Sulphur-containing</b>             |       |       |              |                |             |
| Dimethyl disulphide                   |       |       | X            | X              | X           |
| Cyclohexane, isothiocyanato-          |       |       | X            |                |             |
| <b>Nitrogen-containing</b>            |       |       |              |                |             |
| Methenamine                           |       |       | X            | X              | X           |
| Benzamide, N,N-diethyl-4-methyl-      |       | X     |              |                |             |
| Benzonitrile                          |       |       |              |                | X           |
| <b>Aromatic</b>                       |       |       |              |                |             |
| Benzene                               | X     |       |              |                | X           |
| Benzene, ethyl-                       |       |       | X            |                | X           |
| Benzene, propyl-                      |       |       |              |                | X           |
| Toluene                               |       |       | X            |                |             |
| <b>Ester</b>                          |       |       |              |                |             |
| Acetic acid, methyl ester             |       | X     | X            | X              |             |
| Propanoic acid, methyl ester          |       |       | X            |                |             |
| Butanoic acid, methyl ester           |       |       | X            |                |             |
| Benzoic acid, methyl ester            |       |       | X            |                |             |
| <b>Aldehyde</b>                       |       |       |              |                |             |
| Heptanal                              |       |       | X            |                |             |
| Nonanal                               |       |       | X            |                |             |
| Benzaldehyde                          |       | X     |              |                |             |
| <b>Ketone</b>                         |       |       |              |                |             |
| 2-Butanone                            |       | X     |              |                |             |
| 3-Buten-2-one (Methyl vinyl ketone)   |       |       | X            |                |             |
| 2-Pentanone                           |       | X     | X            |                |             |
| 3-Pentanone                           | X     | X     |              |                |             |
| 5-Hepten-2-one, 6-methyl-             | X     |       |              |                |             |
| <b>Alcohol</b>                        |       |       |              |                |             |
| Ethanol                               |       | X     |              |                |             |
| 2-Propanol                            |       | X     |              |                |             |
| 1-Hexanol, 2-ethyl-                   | X     |       |              |                |             |
| a-Terpineol                           |       |       | X            |                |             |
| <b>Hydrocarbon</b>                    |       |       |              |                |             |
| Pentane                               |       | X     |              | X              |             |
| Pentane, 2-methyl-                    | X     |       |              |                | X           |
| Hexane                                |       | X     | X            |                | X           |
| Hexane, 2,2-dimethyl-                 | X     |       |              |                |             |
| 3-Hexene                              |       |       |              |                | X           |
| Heptane                               |       |       |              |                | X           |
| 1-Heptene                             |       |       |              |                | X           |
| Octane                                |       |       | X            |                |             |
| 1-Octene                              |       |       | X            |                |             |
| Undecane                              |       | X     |              |                |             |
| Heptadecane                           |       |       | X            |                |             |
| Cyclopropane, ethylidene-             |       |       |              |                | X           |
| Cyclopropane, 1-ethyl-2-methyl-, cis- |       | X     |              |                | X           |
| 1,3,5,7-Cyclooctatetraene             |       |       | X            |                |             |
| α-Pinene                              |       | X     |              |                |             |

Table S2. Presence of significant VOCs detected during Summer 2014 trial according to compound class and stage of decomposition.

|                                                   | Fresh | Bloat | Active Decay | Advanced Decay | Dry/ Remains |
|---------------------------------------------------|-------|-------|--------------|----------------|--------------|
| <b>Sulphur-containing</b>                         |       |       |              |                |              |
| Sulphur dioxide                                   |       |       |              | X              |              |
| Carbon disulphide                                 |       |       | X            |                |              |
| Dimethyl disulphide                               | X     | X     | X            | X              | X            |
| Dimethyl trisulphide                              |       | X     | X            | X              | X            |
| Dimethyl tetrasulphide                            |       | X     | X            |                |              |
| Methyl thiolacetate                               |       |       | X            |                |              |
| Methanethiol                                      |       |       | X            | X              | X            |
| Methane, isothiocyanato-                          |       |       |              | X              | X            |
| Thiophene, 2-pentyl-                              |       |       |              | X              |              |
| Thiophene, 3-methyl-                              |       |       |              | X              |              |
| <b>Nitrogen-containing</b>                        |       |       |              |                |              |
| Methenamine                                       |       |       |              |                | X            |
| Methylamine, N,N-dimethyl-                        |       |       | X            | X              |              |
| Acetonitrile, (dimethylamino)-                    |       |       |              |                | X            |
| Butanenitrile, 2-methyl-                          |       |       |              | X              |              |
| Butanenitrile, 3-methyl-                          |       |       |              | X              |              |
| Formamide, N,N-dimethyl-                          |       |       |              | X              |              |
| Benzonitrile                                      |       |       | X            | X              | X            |
| Indole                                            |       |       |              | X              |              |
| Pyrazine, methyl-                                 |       |       | X            |                |              |
| Pyrazine, 2,6-dimethyl-                           |       |       | X            | X              |              |
| Pyridine, 2-methyl-                               |       |       |              | X              | X            |
| Pyridine, 2,6-dimethyl-                           |       |       |              | X              | X            |
| Pyrrole                                           |       |       | X            |                |              |
| <b>Aromatic</b>                                   |       |       |              |                |              |
| 1H-Pyrrole, 1-butyl-                              |       |       | X            |                |              |
| 2-n-Butyl furan                                   |       |       | X            |                |              |
| 5H-1-Pyridine                                     |       |       | X            |                |              |
| Benzene                                           |       |       | X            | X              |              |
| Benzene, 1,3-dimethyl-                            |       |       | X            | X              | X            |
| Benzene, 1,2,3-trimethyl-                         |       |       |              |                | X            |
| Benzene, ethyl-                                   |       |       | X            | X              | X            |
| Benzene, 1-methyl-3-(1-methylethyl)-              |       |       |              |                | X            |
| Furan, 2-methyl-                                  |       |       | X            | X              |              |
| Furan, 2-ethyl-                                   |       |       | X            |                |              |
| Furan, 2-pentyl-                                  |       |       | X            | X              | X            |
| Furan, 2-butyltetrahydro-                         |       |       | X            |                |              |
| Phenol                                            |       |       | X            | X              |              |
| Phenol, 4-methyl-                                 |       |       | X            |                |              |
| o-Cymene                                          |       |       | X            | X              | X            |
| Anisole                                           |       |       |              | X              |              |
| p-Xylene                                          |       |       |              | X              | X            |
| Styrene                                           |       |       | X            | X              | X            |
| Toluene                                           |       |       | X            | X              | X            |
| <b>Halogenated/Other</b>                          |       |       |              |                |              |
| 1-Iodo-2-methylundecane                           | X     |       |              |                |              |
| 1,6-Octadien-3-ol, 3,7-dimethyl-, 2-aminobenzoate |       |       |              | X              |              |
| <b>Ether</b>                                      |       |       |              |                |              |
| Ethanol, 2-methoxy-                               |       |       |              | X              |              |
| 1,4-Dioxane                                       |       |       |              | X              |              |
| 1,3-Dioxolane, 2-methyl-                          |       |       |              | X              | X            |
| 2,2-Dimethoxybutane                               |       |       | X            | X              | X            |
| Butane, 1-methoxy-3-methyl-                       |       |       |              |                | X            |
| Eucalyptol                                        |       |       |              | X              | X            |

Table S2 continued.

|                                               | Fresh | Bloat | Active Decay | Advanced Decay | Dry/ Remains |
|-----------------------------------------------|-------|-------|--------------|----------------|--------------|
| <b>Ester</b>                                  |       |       |              |                |              |
| Acetic acid, methyl ester                     |       |       |              |                | X            |
| Acetic acid ethenyl ester                     | X     |       |              |                |              |
| 2-Propenoic acid, methyl ester                |       |       |              | X              |              |
| Butanoic acid, methyl ester                   |       |       | X            |                |              |
| Butanoic acid, 2-methyl-, methyl ester        |       |       | X            |                |              |
| Butanoic acid, 3-methyl-, methyl ester        |       |       | X            |                |              |
| Benzoic acid, methyl ester                    |       |       |              | X              |              |
| Thiocyanic acid, methyl ester                 |       |       |              | X              | X            |
| Nitric acid, 1-methylethyl ester              |       |       |              |                | X            |
| Salicylic acid, tert.-butyl ester             |       |       |              | X              |              |
| 1-Hexyl-3-butenyl acetate                     |       |       |              | X              |              |
| <b>Aldehyde</b>                               |       |       |              |                |              |
| Acetaldehyde                                  |       |       |              | X              |              |
| Propanal, 2-methyl-                           |       |       | X            |                |              |
| 2-Methylprop-2-enal                           |       |       | X            | X              |              |
| Butanal                                       |       |       | X            |                |              |
| Butanal, 2-methyl-                            |       |       | X            | X              | X            |
| Butanal, 3-methyl-                            |       |       | X            | X              | X            |
| 2-Butenal, 2-methyl-, (E)-                    |       |       | X            |                |              |
| 2-Butenal, 3-methyl-                          |       |       |              | X              |              |
| Pentanal                                      |       |       |              |                | X            |
| Hexanal                                       | X     |       | X            | X              | X            |
| Heptanal                                      | X     |       | X            |                | X            |
| Octanal                                       | X     |       | X            |                | X            |
| Nonanal                                       | X     |       | X            | X              | X            |
| Benzaldehyde                                  |       |       | X            | X              | X            |
| <b>Ketone</b>                                 |       |       |              |                |              |
| 2-Butanone                                    |       |       |              | X              | X            |
| 2-Butanone, 3-methyl-                         |       |       | X            | X              | X            |
| 2,3-Butanedione                               |       |       | X            | X              | X            |
| 3-Buten-2-one (Methyl vinyl ketone)           |       |       | X            | X              | X            |
| 1-Penten-3-one                                |       |       |              |                |              |
| 2-Pentanone                                   |       |       | X            | X              | X            |
| 2-Pentanone, 3-methyl-                        |       |       | X            |                | X            |
| 2,3-Pentanedione                              |       |       | X            | X              | X            |
| 3-Pentanone                                   |       |       |              | X              | X            |
| 3-Penten-2-one                                |       |       | X            | X              | X            |
| 3-Pentanone, 2,4-dimethyl-                    |       |       |              | X              | X            |
| 4-Methylpentan-2-one (Methyl isobutyl ketone) |       |       | X            | X              | X            |
| Cyclopentanone                                |       |       |              | X              |              |
| 2-Hexanone                                    |       |       | X            | X              | X            |
| 2-Hexanone, 5-methyl-                         |       |       |              |                | X            |
| 3-Hexanone                                    |       |       | X            | X              | X            |
| 2,3-Hexanedione                               |       |       | X            |                |              |
| 2-Heptanone                                   |       |       | X            | X              | X            |
| 5-Hepten-2-one, 6-methyl-                     |       |       |              | X              | X            |
| 2-Octanone                                    |       |       |              |                | X            |
| 1-Octen-3-one                                 |       |       | X            | X              | X            |
| 3-Octanone                                    |       |       | X            | X              | X            |
| 2-Nonanone                                    |       |       | X            | X              | X            |
| 2-Undecanone                                  |       |       |              | X              | X            |
| Phenylethanone                                |       |       | X            | X              | X            |

Table S2 continued.

|                                                         | Fresh | Bloat | Active Decay | Advanced Decay | Dry/ Remains |
|---------------------------------------------------------|-------|-------|--------------|----------------|--------------|
| <b>Alcohol</b>                                          |       |       |              |                |              |
| Ethanol                                                 |       |       | X            | X              | X            |
| 1-Propanol                                              |       |       | X            | X              | X            |
| 1-Propanol, 2-methyl-                                   |       |       | X            |                |              |
| 2-Propanol                                              |       |       | X            | X              | X            |
| 1-Butanol                                               |       |       | X            | X              | X            |
| 1-Butanol, 3-methyl-                                    |       |       | X            | X              | X            |
| 2-Butanol                                               |       |       | X            | X              | X            |
| 1-Pentanol                                              |       |       | X            |                |              |
| 1-Penten-3-ol                                           |       |       | X            |                |              |
| 2-Pentanol                                              |       |       | X            | X              |              |
| 1-Hexanol                                               |       |       | X            | X              |              |
| 1-Heptanol                                              |       |       | X            |                |              |
| 1-Octanol                                               |       |       | X            |                |              |
| 6-Methyl-1-octanol                                      |       | X     |              |                |              |
| 1-Octen-3-ol                                            |       |       | X            |                | X            |
| 2-Methyl-1-undecanol                                    |       |       |              | X              |              |
| 1-Dodecanol                                             |       |       |              | X              |              |
| 1,6-Octadien-3-ol, 3,7-dimethyl-                        |       |       |              |                | X            |
| <b>Hydrocarbon</b>                                      |       |       |              |                |              |
| 1-Butene, 3-methyl-                                     |       |       |              | X              |              |
| Butane, 2-methyl-                                       |       |       | X            |                |              |
| Pentane                                                 |       |       | X            |                | X            |
| Hexane                                                  |       |       |              | X              | X            |
| Hexane, 2,2-dimethyl-                                   |       |       | X            |                |              |
| Heptane                                                 |       |       | X            | X              | X            |
| Heptane, 3-methylene-                                   |       |       | X            | X              |              |
| 1-Heptene                                               |       |       |              | X              | X            |
| Octane                                                  |       |       | X            | X              | X            |
| 1-Octene                                                |       |       |              |                | X            |
| 2-Octene                                                |       |       |              |                | X            |
| Nonane                                                  |       |       |              | X              | X            |
| Undecane                                                |       |       |              | X              | X            |
| 1-Tridecene                                             | X     |       |              |                |              |
| Tetradecane                                             | X     |       |              |                |              |
| 1,13-Tetradecadiene                                     |       |       |              | X              |              |
| Pentadecane                                             |       | X     |              |                |              |
| Hexadecane                                              | X     |       | X            | X              | X            |
| 8-Heptadecene                                           |       |       | X            |                | X            |
| Eicosane                                                |       |       | X            |                |              |
| 1,3,5-Cycloheptatriene                                  |       |       |              |                | X            |
| 1,4-Cyclohexadiene, 1-methyl-                           |       |       |              |                | X            |
| Cyclopropane, ethyl-                                    |       |       |              |                | X            |
| Cyclopropane, ethylidene-                               |       |       |              |                | X            |
| Cyclopentane, butyl-                                    |       |       |              | X              |              |
| Cyclohexene, 1-methyl-4-(1-methylethenyl)-              |       |       |              |                | X            |
| Camphene                                                |       |       | X            | X              | X            |
| Cetene                                                  |       |       |              | X              |              |
| Limonene                                                |       |       | X            | X              | X            |
| Phellandrene                                            |       |       |              | X              | X            |
| Pinene                                                  |       |       | X            | X              | X            |
| Aromandendrene                                          |       |       |              | X              | X            |
| Bicyclo[2.2.1]heptane, 2,2-dimethyl-3-methylene-        |       |       |              | X              |              |
| Bicyclo[2.2.1]heptane, 7,7-dimethyl-2-methylene-        |       |       |              |                | X            |
| Bicyclo[3.1.0]hex-2-ene, 2-methyl-5-(1-methylethyl)-    |       |       |              | X              |              |
| Bicyclo[3.1.0]hex-2-ene, 4-methyl-1-(1-methylethyl)-    |       |       |              |                | X            |
| Bicyclo[3.1.0]hex-2-ene, 4-methylene-1-(1-methylethyl)- |       |       |              |                | X            |
